# Supplementary material
Source: Springer Nature journal article supplement (https://www.springermedizin.de/resource/supplementary/12891_2014_2053_MOESM1_ESM.pdf/9510192)
Supplement: MOESM1 [file 9510192]

Have you had difficulty with any of the following activities over the PAST 7 DAYS because of an ache

or pain in the elbow, forearm, wrist or hand?

|                                          | Yes                      | No                       | Not applicable           |
|------------------------------------------|--------------------------|--------------------------|--------------------------|
| a. Carrying bags                         | <input type="checkbox"/> | <input type="checkbox"/> | <input type="checkbox"/> |
| b. Getting dressed                       | <input type="checkbox"/> | <input type="checkbox"/> | <input type="checkbox"/> |
| c. Opening doors                         | <input type="checkbox"/> | <input type="checkbox"/> | <input type="checkbox"/> |
| d. Getting things down from high shelves | <input type="checkbox"/> | <input type="checkbox"/> | <input type="checkbox"/> |
| e. Fastening your clothing               | <input type="checkbox"/> | <input type="checkbox"/> | <input type="checkbox"/> |
| f. Heavy jobs around the house           | <input type="checkbox"/> | <input type="checkbox"/> | <input type="checkbox"/> |
| g. Moving your arm(s) or hand(s)         | <input type="checkbox"/> | <input type="checkbox"/> | <input type="checkbox"/> |
| h. Undoing lids on bottles or jars       | <input type="checkbox"/> | <input type="checkbox"/> | <input type="checkbox"/> |
| i. Writing                               | <input type="checkbox"/> | <input type="checkbox"/> | <input type="checkbox"/> |
| j. Driving                               | <input type="checkbox"/> | <input type="checkbox"/> | <input type="checkbox"/> |
| k. Sleeping                              | <input type="checkbox"/> | <input type="checkbox"/> | <input type="checkbox"/> |
